# Supplementary material for: The glycolytic pathway of Trimastix pyriformis is an evolutionary mosaic
Source: PubMed Central journal article supplement (PMC1665464; doi:10.1186/1471-2148-6-101), 2006-11-23
Supplement: 1471-2148-6-101-S5.pdf [file 1471-2148-6-101-S5.pdf]

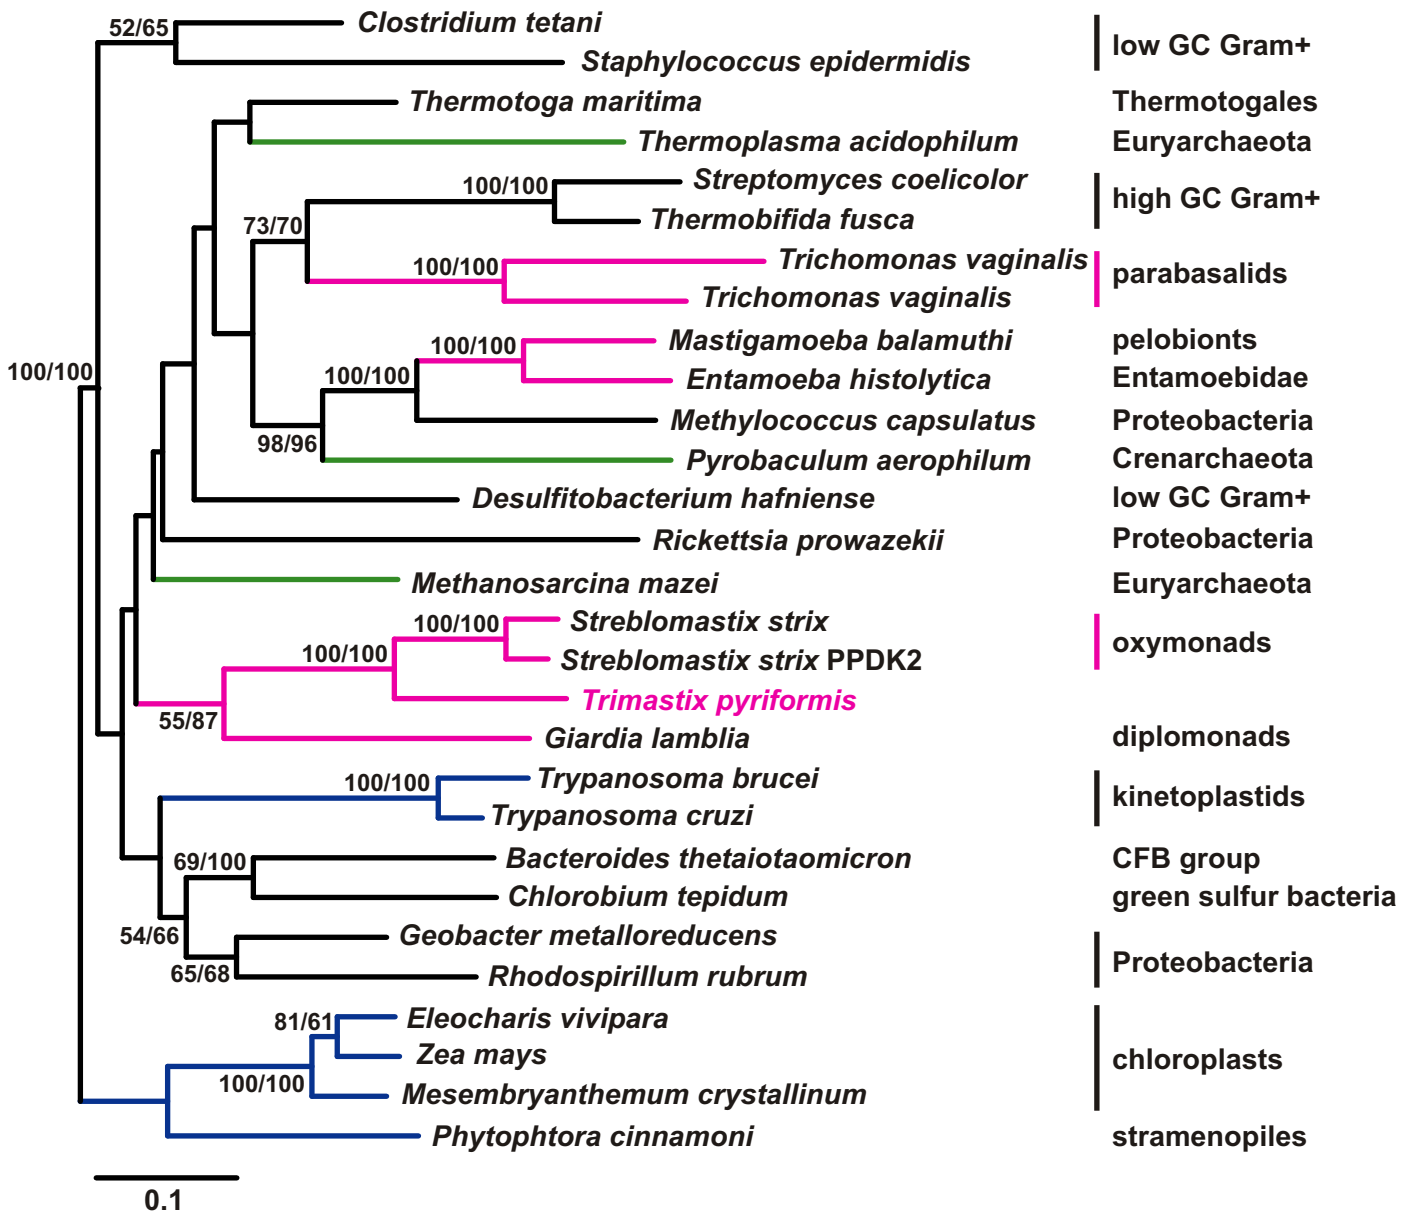

Additional File 5 - pyruvate phosphate dikinase
